# Supplementary material for: CD4+CD45RA−FOXP3lowRegulatory T Cells as Potential Biomarkers of Disease Activity in Systemic Lupus Erythematosus Brazilian Patients
Source: Hindawi journal article supplement (doi:10.1155/2018/3419565), 2018-06-12
Supplement: f1 [file 3419565.f1.pdf]

## SUPPLEMENTARY MATERIAL

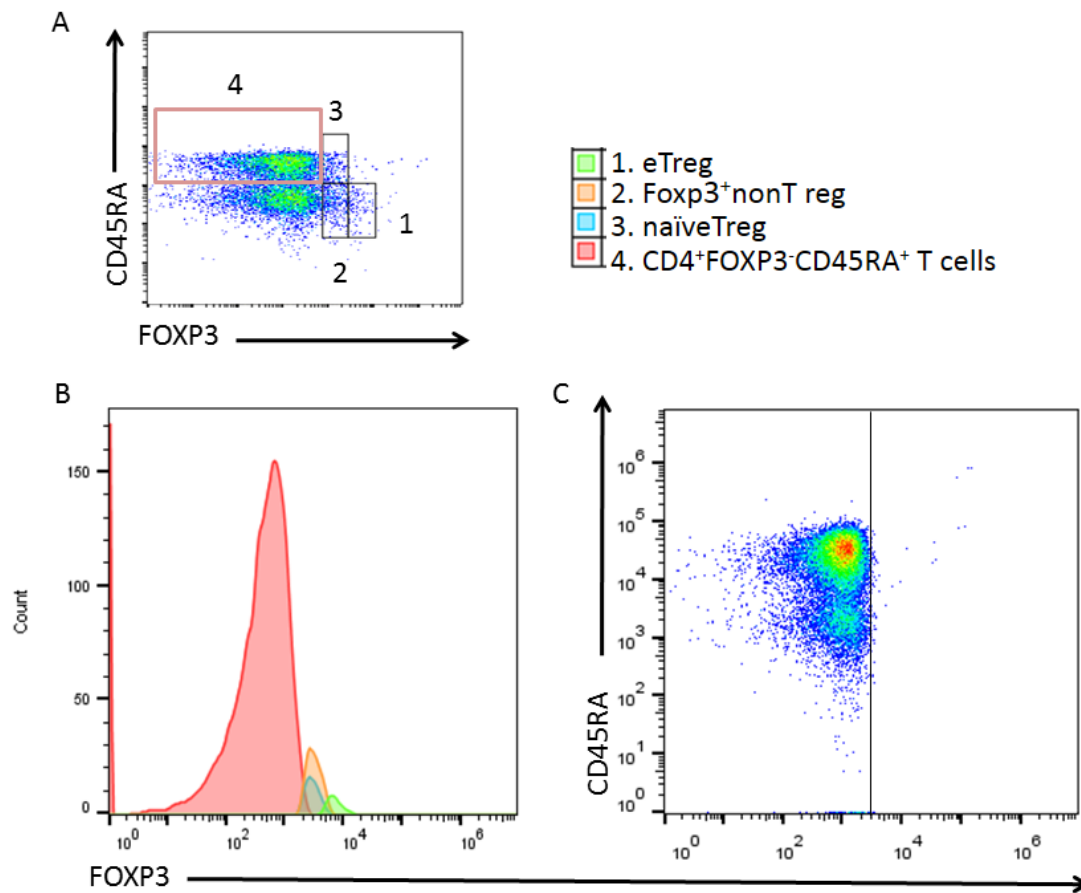

**Figure S1:** Additional representative analysis of the positive region delimitation. eTreg (1), Foxp3<sup>+</sup>nonTreg (2), naïveTreg (3) and CD4<sup>+</sup>FOXP3<sup>+</sup>CD45RA<sup>+</sup> T cells (4) (A). Differential PE-conjugated anti-FOXP3 antibody fluorescence intensity in eTreg, Foxp3<sup>+</sup>nonTreg, naïveTreg and CD4<sup>+</sup>FOXP3<sup>+</sup>CD45RA<sup>+</sup> T cells (4) subtypes (B). FMO control for FOXP3 delimitation (all fluorochromes minus FOXP3 marker) (C).

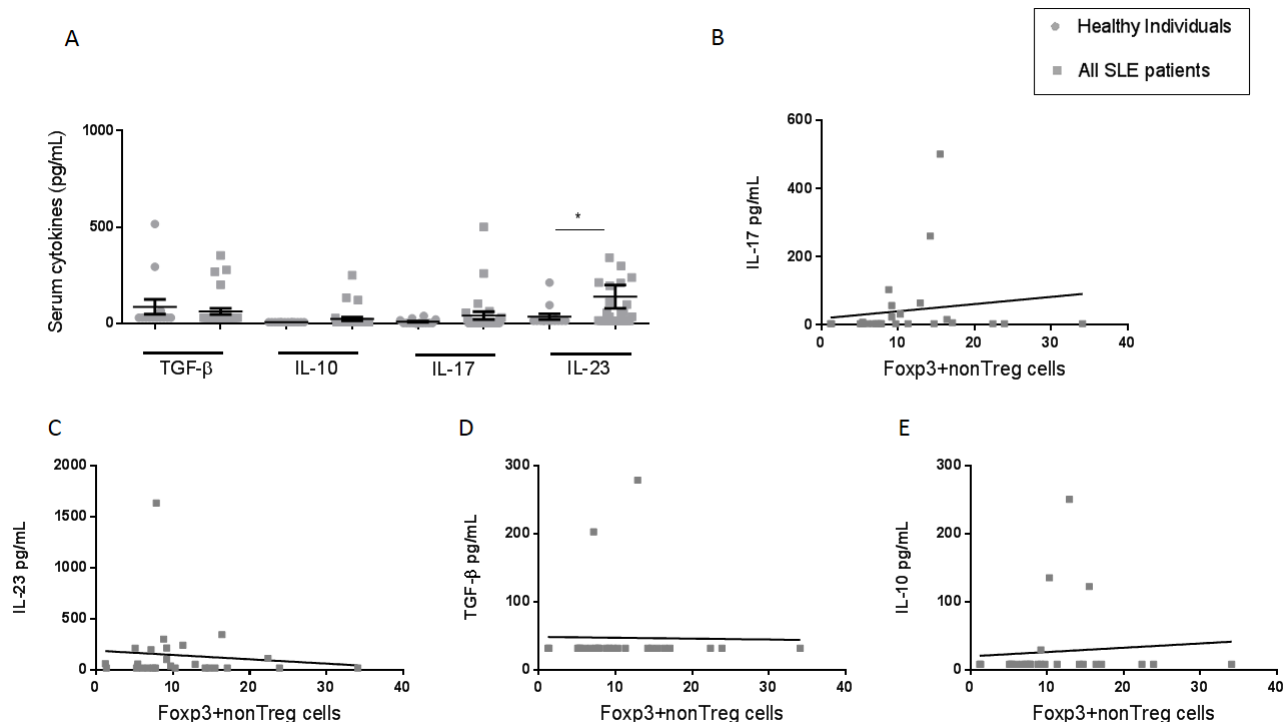

**Figure S2:** Th17 and Treg related cytokines in the serum of SLE patients and healthy donors (A). Foxp3<sup>+</sup>nonTreg cells related to serum concentrations of IL-17 (B), IL-23 (C), TGF- $\beta$  (D), IL-10 (E) in SLE patients. All cytokines in SLE patients serum and healthy donors were measured using specific ELISA kits following the manufacturer's recommendations (eBiosciences or BD Biosciences). \* $p < 0.05$ .

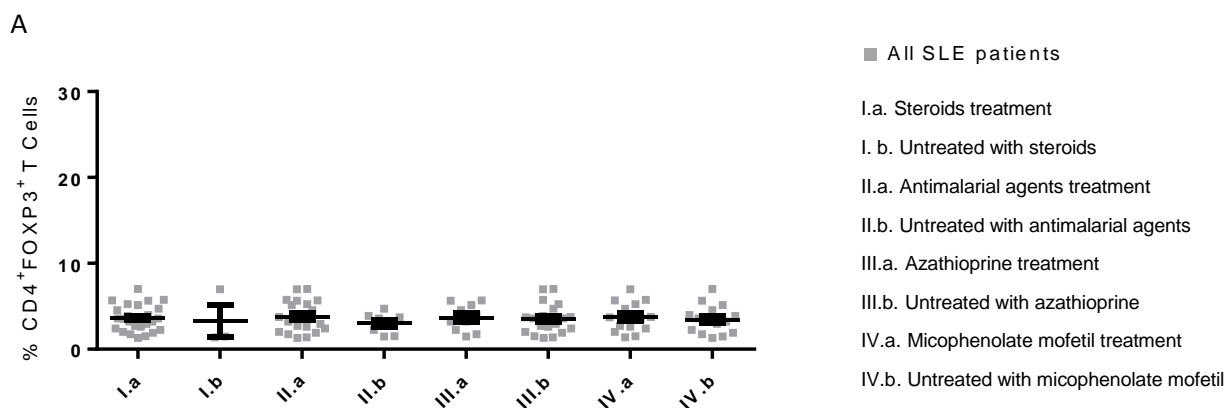

B

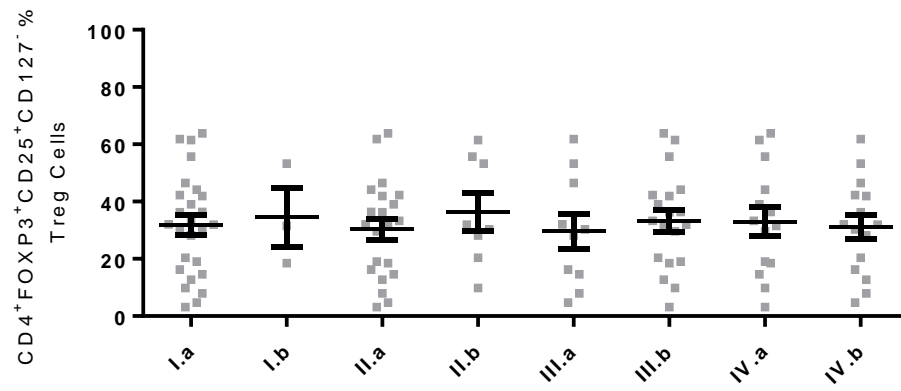

C

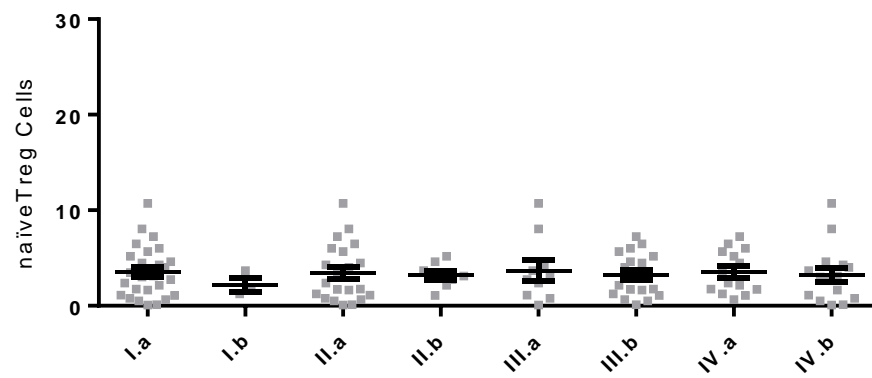

D

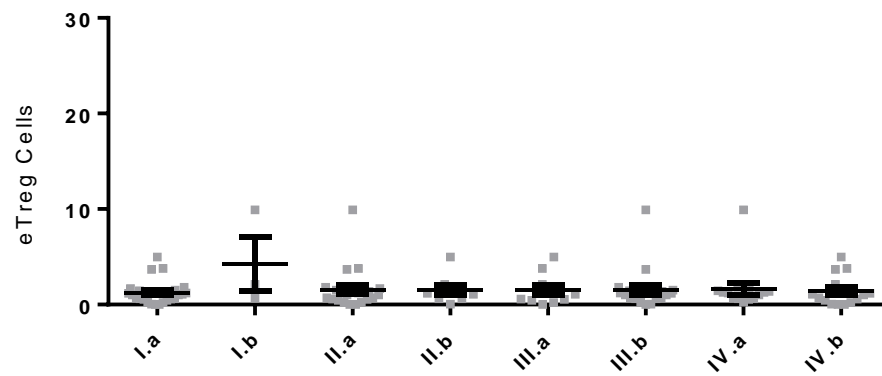

E

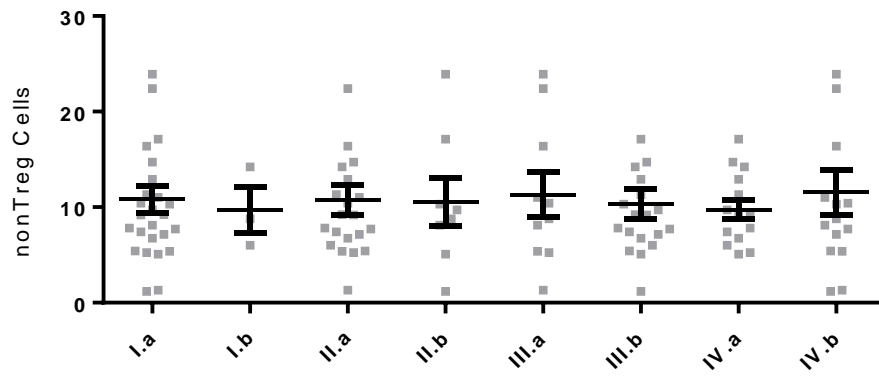

**Figure S3:** Treg subsets did not change in relation to the treatment adopted. (%) of the CD4<sup>+</sup>FOXP3<sup>+</sup> Treg cells (A), CD4<sup>+</sup>FOXP3<sup>+</sup>CD25<sup>+</sup>CD127<sup>-</sup> Treg cells (B), naïveTreg cells (C), eTreg cells (D) and Foxp3<sup>+</sup>nonTreg cells in relation to the treatment adopted for SLE patients (E).
